# Supplementary material for: Effect of restricting the legal supply of prescription opioids on buying through online illicit marketplaces: interrupted time series analysis
Source: PubMed Central journal article supplement — BMJ. 2018 Jun 13;361:k2270. doi: 10.1136/bmj.k2270 (PMC5998052; doi:10.1136/bmj.k2270), 2018-06-13
Supplement: marj043163.wt1.pdf [file marj043163.wt1.pdf]

**Appendix Table 1: Drug categorisations, descending order of listing frequency**

| <b>Content</b>              |                                                                                                                                                                                                                                                                                                                                                                                                                                                                                                              |
|-----------------------------|--------------------------------------------------------------------------------------------------------------------------------------------------------------------------------------------------------------------------------------------------------------------------------------------------------------------------------------------------------------------------------------------------------------------------------------------------------------------------------------------------------------|
| <b>Drug classifications</b> |                                                                                                                                                                                                                                                                                                                                                                                                                                                                                                              |
| Prescription sedatives      | Xanax, Alprazolam, Diazepam, Clonazepam, Valium, Ambien, Etizolam, Ativan, Rivotril, Zopiclone, Bromazepam, Nitrazepam, Restoril, Temazepam, Carisoprodol, Lorazepam, Soma, Flubromazolam, Promethazine, Oxazepam, Diclazepam, Midazolam, Zolpidem, other products (each less than 0.5% of listings)                                                                                                                                                                                                         |
| Prescription opioids        | Fentanyl, Oxycodone, Tramadol, Oxycontin, Codeine, Hydrocodone, Morphine, Subutex, Methadone, Buprenorphine, Percocet, Suboxone, Tapentadol, Hydromorphone, Norco, Roxicodone, Opana, Watson, Tilidine, Dilaudid, Acetylfentanyl, MT-45, Furanyl-Fentanyl, Oxymorphone, Vicodin, Oxynorm, Cough Syrup, Percodan, Dolcontin, Naloxone, Zubsolv, Diamorphine, ketogan, Duranzo, other products (each less than 0.5% of listings)                                                                               |
| Prescription steroids       | Testosterone, Trenbolone Acetate, Testosterone Propionate, Sustanon, Clenbuterol, Anavar, Human Growth Hormone, Winstrol, Testosterone Cypionate, Boldenone, Stanozolol, Decanoate, Dianabol, Deca Durabolin, Danabol, Trenbolone Enanthate, Primobolan, Anadrol, Masteron, Drostanolone, Turanabol, Proviron, Testosterone Enanthate, Liothyronine Sodium, Nandrolone Phenylpropionate, Nandrolone, Insulin, Oxandrolone, Halotestin, Equipoise, Aromasin, other products (each less than 0.5% of listings) |
| Prescription stimulants     | Adderall, Modafinil, Ritalin, Methylphenidate, Phentermine, Ephedrine, Dexedrine, Dexamphetamine, Concerta, Dextroamphetamine, Armodafinil, other products (each less than 0.5% of listings)                                                                                                                                                                                                                                                                                                                 |
| Other prescription          | Viagra, Cialis, Kamagra, Levitra, Clomid, Anastrozole, Nolvadex , Tamoxifen, Letrozole, Finasteride, Priligy, Fluoxetine, sildenafil , Amitriptyline, super-p force, Mirtazapine, Citalopram, Sertraline, Effexor, Cymbalta, Celexa, Zoloft, Arimidex , other products (each less than 0.5% of listings)                                                                                                                                                                                                     |
| Illicit opioids             | Heroin, Opium, Kratom                                                                                                                                                                                                                                                                                                                                                                                                                                                                                        |
| <b>Specific opioids</b>     |                                                                                                                                                                                                                                                                                                                                                                                                                                                                                                              |
| Hydrocodone                 | Hydrocodone, Norco, Vicodin                                                                                                                                                                                                                                                                                                                                                                                                                                                                                  |
| Oxycodone                   | Oxycodone, Oxycontin, Roxicodone                                                                                                                                                                                                                                                                                                                                                                                                                                                                             |
| Fentanyl                    | Fentanyl, Carfentanil, Actiq, Furanyl-Fentanyl                                                                                                                                                                                                                                                                                                                                                                                                                                                               |
| Tramadol                    | Tramadol                                                                                                                                                                                                                                                                                                                                                                                                                                                                                                     |

**Appendix Table 2: Descriptive statistics for the percentage of sales represented by each drug type, whether originating from the USA or elsewhere**

|                         |             | Mean | $\sigma$ | P25 | p50 | p75  |
|-------------------------|-------------|------|----------|-----|-----|------|
| Prescription sedatives  | Within USA  | 10.4 | 7.2      | 5.9 | 9.2 | 12.6 |
|                         | Outside USA | 6.9  | 7.1      | 4.0 | 5.7 | 8.2  |
| Prescription opioids    | Within USA  | 11.1 | 10.4     | 5.7 | 9.5 | 13.1 |
|                         | Outside USA | 3.5  | 2.7      | 1.9 | 3.1 | 4.3  |
| Prescription steroids   | Within USA  | 2.4  | 2.9      | 0.9 | 1.6 | 3.2  |
|                         | Outside USA | 1.2  | 1.9      | 0.4 | 0.9 | 1.4  |
| Prescription stimulants | Within USA  | 4.5  | 5.4      | 2.4 | 3.4 | 4.7  |
|                         | Outside USA | 1.9  | 2.1      | 0.9 | 1.5 | 2.1  |
| Other prescription      | Within USA  | 2.1  | 3.6      | 0.9 | 1.5 | 2.2  |
|                         | Outside USA | 1.4  | 1.6      | 0.7 | 1.1 | 1.6  |
| Illicit opioids         | Within USA  | 5.6  | 11.5     | 1.8 | 3.5 | 5.2  |
|                         | Outside USA | 5.1  | 3.6      | 2.5 | 4.6 | 7.4  |
